# Supplementary material for: Processing of a P(NDI2OD-T2) film without an intermediate wetting layer during spin-coating to improve charge carrier mobility
Source: Royal Society of Chemistry journal article supplement (doi:10.1039/d4py00772g), 2024-01-01
Supplement: d4py00772g1.pdf [file d4py00772g1.pdf]

## Supporting Information

### Processing of the P(NDI2OD-T2) Film without Intermediate Wetting Layer during the Spin-coating to Improve the Charge Carrier Mobility

Sichun Wang<sup>a,b</sup>, Junhang Li<sup>a,c</sup>, Xinyu Liu<sup>a,c</sup>, Qiang Zhang<sup>a</sup>, Xinhong Yu<sup>a</sup>,  
and Yanchun Han<sup>\*a,c</sup>

<sup>a</sup>State Key Laboratory of Polymer Physics and Chemistry, Changchun  
Institute of Applied Chemistry, Chinese Academy of Sciences,  
Changchun 130022, P. R. China

<sup>b</sup>Laboratory of Molecular Materials and Devices, Department of  
Materials Science, Fudan University, 200433 Shanghai, P.R. China

<sup>c</sup>School of Applied Chemistry and Engineering, University of Science  
and Technology of China, Hefei 230026, P. R. China

### ***Supporting Information contents***

Table S1. The film thickness at various substrate temperatures.

Table S2, S4-S6. Relationship between the substrate temperature and solvent evaporation rate in various solvents.

Table S3. The fibrous length and width.

Fig. S1. SAXS diffraction patterns of P(NDI2OD-T2) films.

Fig. S2. Transfer and output characteristic curves of different OFET devices.

**Table S1.** The film thickness at various substrate temperatures.

| Substrate temperature (°C) | Average film thickness (nm) |
|----------------------------|-----------------------------|
| 25                         | 31±2                        |
| 60                         | 33±2                        |
| 80                         | 32±3                        |
| 100                        | 29±5                        |
| 110                        | 27±3                        |

**Table S2.** Relationship between substrate temperature and solvent evaporation speed in p-Xylene (PX) solvent.

| Solvent | Boiling point (°C) | Molar volume (ml mol <sup>-1</sup> ) | Substrate temperature (°C) | Solvent evaporation speed (µm s <sup>-1</sup> ) |
|---------|--------------------|--------------------------------------|----------------------------|-------------------------------------------------|
| PX      | 138                | 123.3                                | 25                         | 6.4±0.2                                         |
|         |                    |                                      | 60                         | 31.6±1.0                                        |
|         |                    |                                      | 80                         | 69.1±2.5                                        |
|         |                    |                                      | 90                         | 98.0±3.5                                        |
|         |                    |                                      | 95                         | 115.6±4.7                                       |
|         |                    |                                      | 98                         | 129.0±5.3                                       |
|         |                    |                                      | 99                         | 133.0±5.4                                       |
|         |                    |                                      | 100                        | 137.0±5.6                                       |
|         |                    |                                      | 110                        | 189.0±6.6                                       |
|         |                    |                                      | 120                        | 257.5±9.1                                       |

**Table S3.** The fibrous length and width obtained by TEM.

| Substrate temperature (°C) | Fibrous length (nm) | Fibrous length (nm) |
|----------------------------|---------------------|---------------------|
| 25                         | 90±14               | 4.2±1.5             |
| 60                         | 113±19              | 5.6±1.9             |
| 80                         | 145±26              | 7.1±2.4             |
| 100                        | 185±27              | 9.8±3.8             |
| 110                        | 187±32              | 11.6±4.6            |

**Table S4.** Relationship between the substrate temperature and solvent evaporation speed in o-Xylene (OX) solvent.

| Solvent | Boiling point (°C) | Molar volume (ml mol <sup>-1</sup> ) | Substrate temperature (°C) | Solvent evaporation speed (μm s <sup>-1</sup> ) |
|---------|--------------------|--------------------------------------|----------------------------|-------------------------------------------------|
| OX      | 143                | 123.3                                | 25                         | 5.3±0.2                                         |
|         |                    |                                      | 60                         | 26.8±1.1                                        |
|         |                    |                                      | 80                         | 59.1±2.5                                        |
|         |                    |                                      | 90                         | 84.8±3.4                                        |
|         |                    |                                      | 95                         | 100.5±4.1                                       |
|         |                    |                                      | 100                        | 117.9±4.8                                       |
|         |                    |                                      | 103                        | 131.6±5.4                                       |
|         |                    |                                      | 105                        | 139.8±5.7                                       |
|         |                    |                                      | 110                        | 165.7±6.7                                       |
|         |                    |                                      | 120                        | 225.9±9.2                                       |

**Table S5.** Relationship between the substrate temperature and solvent evaporation speed in m-Xylene (MX) solvent.

| Solvent | Boiling point (°C) | Molar volume (ml mol <sup>-1</sup> ) | Substrate temperature (°C) | Solvent evaporation speed (μm s <sup>-1</sup> ) |
|---------|--------------------|--------------------------------------|----------------------------|-------------------------------------------------|
| MX      | 139                | 123.3                                | 25                         | 6.2±0.2                                         |
|         |                    |                                      | 60                         | 30.6±1.2                                        |
|         |                    |                                      | 80                         | 66.7±2.7                                        |
|         |                    |                                      | 90                         | 94.6±3.9                                        |
|         |                    |                                      | 95                         | 113.3±4.6                                       |
|         |                    |                                      | 100                        | 133.0±5.4                                       |
|         |                    |                                      | 105                        | 157.6±6.4                                       |
|         |                    |                                      | 110                        | 184.9±7.6                                       |
|         |                    |                                      | 120                        | 249.6±10.2                                      |

**Table S6.** Relationship between the substrate temperature and solvent evaporation speed in toluene (Tol) solvent.

| Solvent | Boiling point (°C) | Molar volume (ml mol <sup>-1</sup> ) | Substrate temperature (°C) | Solvent evaporation speed (μm s <sup>-1</sup> ) |
|---------|--------------------|--------------------------------------|----------------------------|-------------------------------------------------|
| Tol     | 111                | 105.9                                | 25                         | 14.2 ± 0.5                                      |
|         |                    |                                      | 40                         | 29.1 ± 1.2                                      |
|         |                    |                                      | 60                         | 63.4 ± 2.6                                      |
|         |                    |                                      | 80                         | 131.6 ± 5.4                                     |
|         |                    |                                      | 81                         | 135.6 ± 5.6                                     |
|         |                    |                                      | 85                         | 156.0 ± 6.4                                     |
|         |                    |                                      | 90                         | 181.3 ± 7.4                                     |
|         |                    |                                      | 100                        | 252.1 ± 10.3                                    |

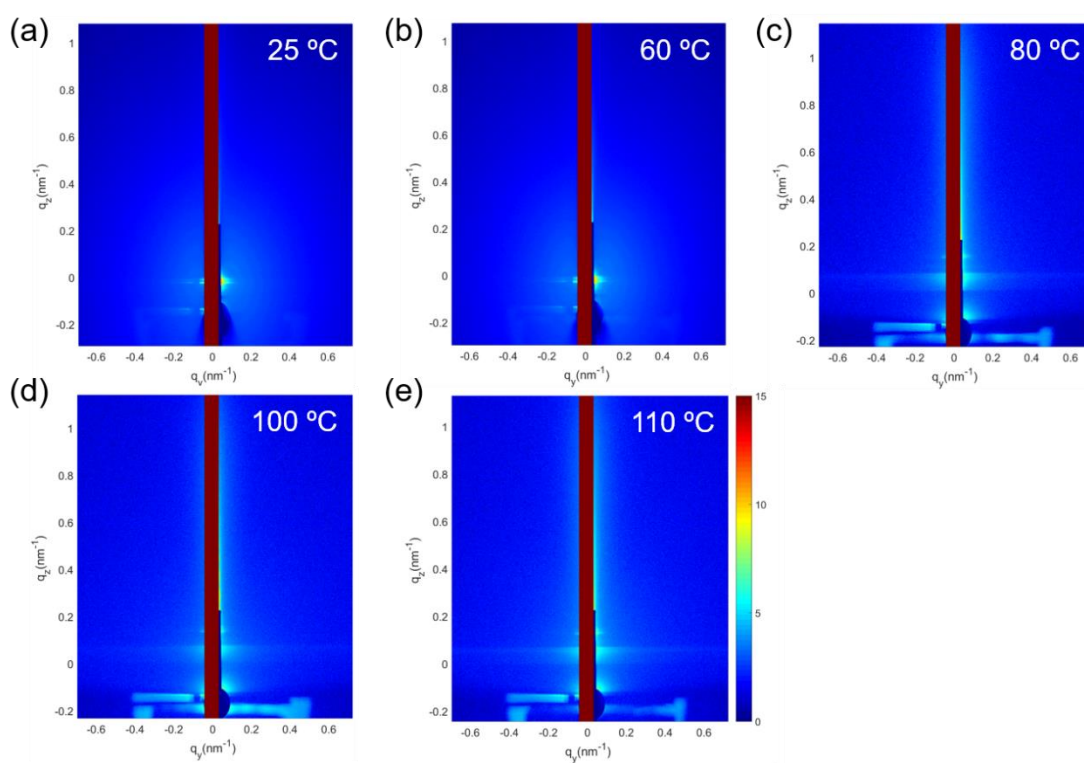

**Fig. S1** SAXS diffraction patterns of P(NDI2OD-T2) films at different substrate temperatures.

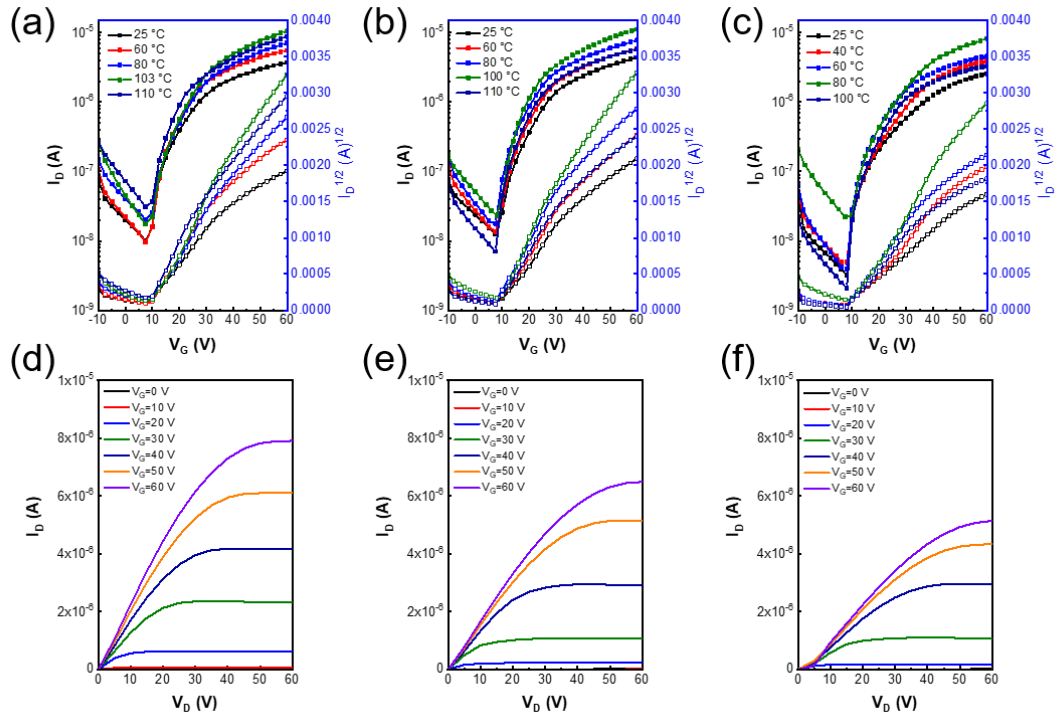

**Fig. S2** Transfer and output characteristic curves of OFETs devices with P(NDI2OD-T2) film under different film formation conditions (a, d) OX, (b, e) MX, and (c, f) Tol, respectively.
